# Supplementary material
Source: PubMed Central journal article supplement (PMC6168304)
Supplement: 10.1194_M082008_jlr.M082008-1.pdf [file 10.1194_M082008_jlr.M082008-1.pdf]

**Supplemental Information:**

**Autotaxin-Lysophosphatidic Acid Signaling Contributes to Obesity-Induced Insulin Resistance in Muscle and Impairs Mitochondrial Metabolism**

Kenneth D'Souza<sup>1</sup>, Carine Nzirorera<sup>1</sup>, Andrew M. Cowie<sup>1</sup>, Geena P. Varghese<sup>1</sup>, Purvi Trivedi<sup>1</sup>, Thomas O. Eichmann<sup>2</sup>, Dipsikha Biswas<sup>1</sup>, Mohamed Touaibia<sup>3</sup>, Andrew J. Morris<sup>4</sup>, Vassilis Aidinis<sup>5</sup>, Daniel A. Kane<sup>5</sup>, Thomas Pulinilkunnil<sup>1</sup>, and Petra C. Kienesberger<sup>1,\*</sup>

<sup>1</sup>*Dalhousie Medicine New Brunswick, Department of Biochemistry and Molecular Biology, Dalhousie University, 100 Tucker Park Road, Saint John, NB, E2L 4L5, Canada;* <sup>2</sup>*Institute of Molecular Biosciences, University of Graz, Heinrichstrasse 31 & Center for Explorative Lipidomics, BioTechMed-Graz, 8010 Graz, Austria;* <sup>3</sup>*Department of Chemistry and Biochemistry, Université de Moncton, Moncton, NB, E1A 3E9, Canada;* <sup>4</sup>*Division of Cardiovascular Medicine, University of Kentucky, KY 40536, and Lexington Veterans Affairs Medical Center, KY 40511;* <sup>5</sup>*Division of Immunology, Biomedical Sciences Research Center "Alexander Fleming", 34 Fleming Street, 16672, Athens, Greece;* <sup>5</sup>*Department of Human Kinetics, St. Francis Xavier University, 1 West Street, Antigonish, NS, B2G 2W5, Canada;* \**To whom correspondence should be addressed: Petra C. Kienesberger, Dalhousie Medicine New Brunswick, Department of Biochemistry and Molecular Biology, Dalhousie University, 100 Tucker Park Road, Saint John, NB, E2L 4L5, Canada. Tel: +1-506-636-6971; Fax: +1-506-636-6001; E-mail: [pkienesb@Dal.Ca](mailto:pkienesb@Dal.Ca).*

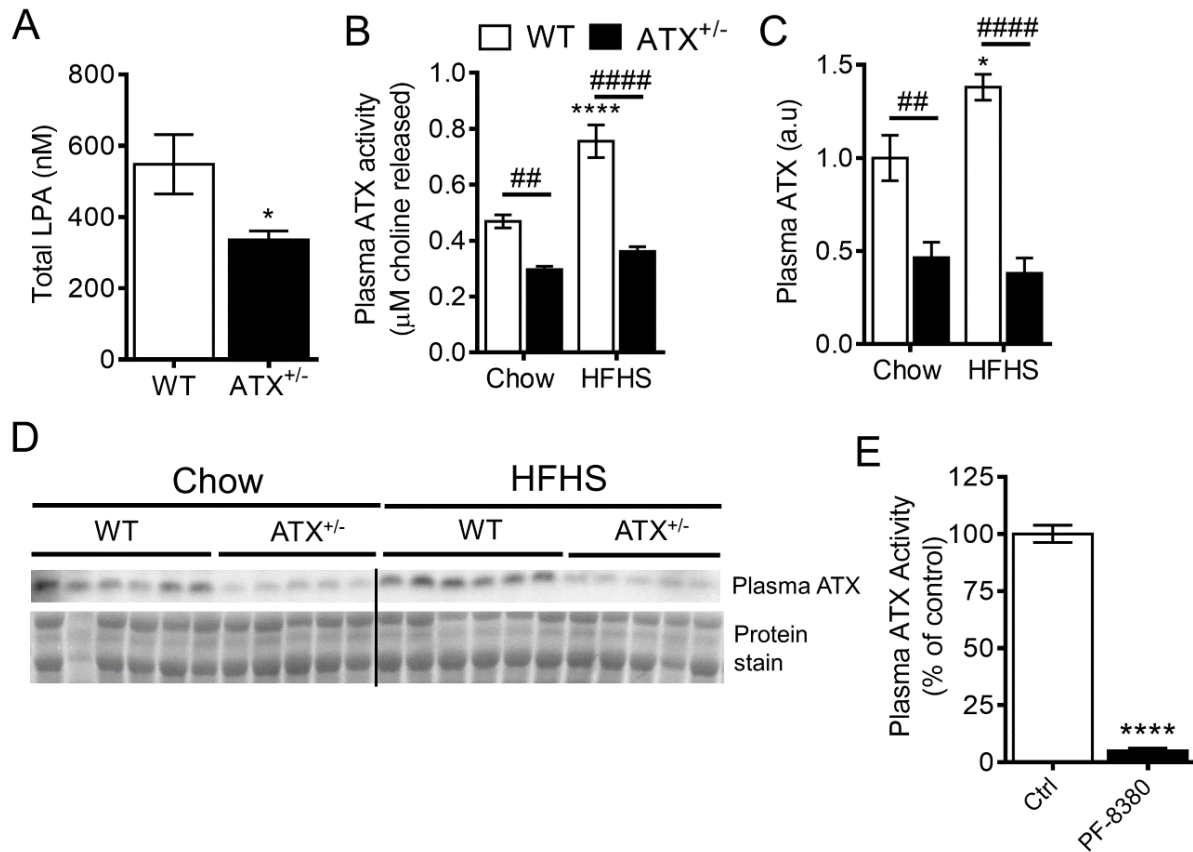

**Supplemental Figure S1. Plasma ATX activity and protein levels are reduced in male chow and HFHS-fed ATX<sup>+/-</sup> mice.** (A) Plasma LPA levels ( $n = 7-8$ ) in chow-fed WT and ATX<sup>+/-</sup> mice. (B) Plasma ATX activity ( $n = 9-11$ ) and (C, D) ATX protein content ( $n = 5-6$ ) in chow and HFHS-fed WT and ATX<sup>+/-</sup> mice. (E) Inhibition of ATX activity using PF-8380 blunts choline release, demonstrating that choline release is highly ATX dependant. (A, E) Statistical analysis was performed using a Student's t-test or (B, C) two-way ANOVA followed by a Tukey's multiple comparison test; (A-C, E)  $*p < 0.05$ ,  $****p < 0.0001$  vs. chow/WT/ctrl; ## $p < 0.01$ , #### $p < 0.0001$  as indicated.

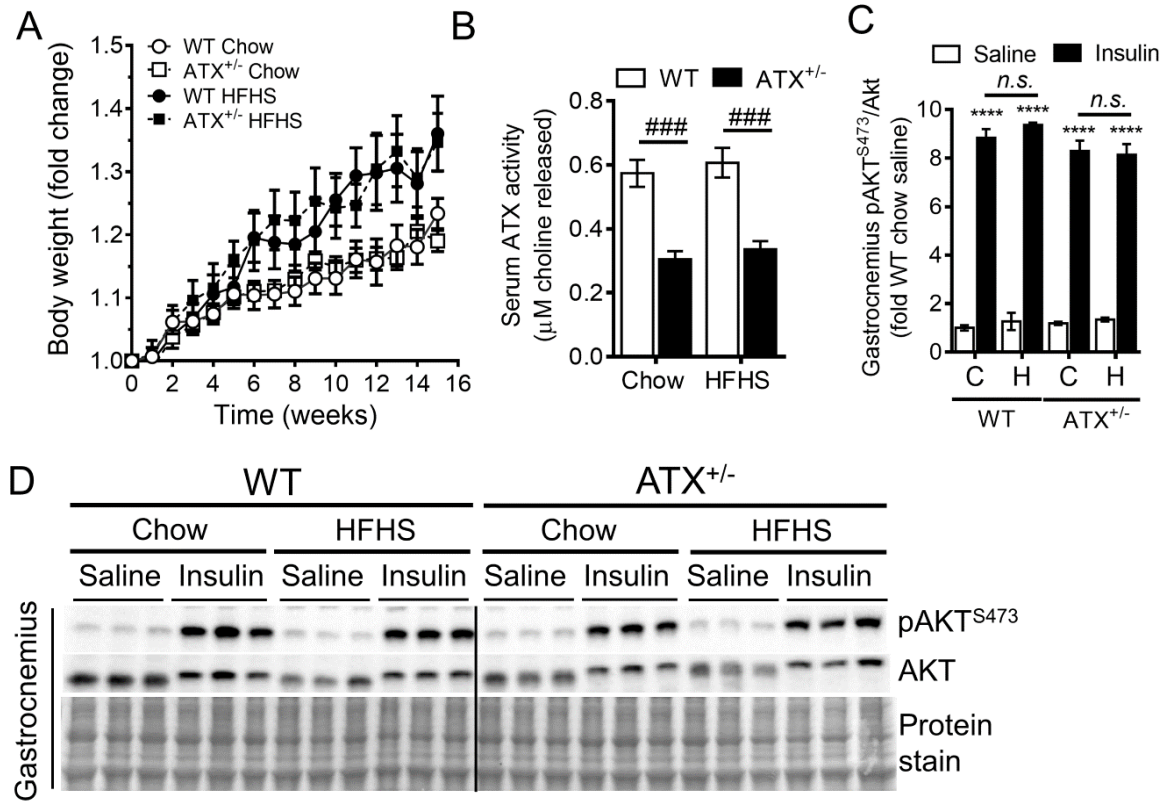

**Supplemental Figure S2. Female mice are protected from HFHS diet-induced insulin resistance and upregulation of ATX.** (A) Body weight gain and (B) serum ATX activity in chow and HFHS-fed WT and ATX<sup>+/-</sup> mice. (C-D) Immunoblot and densitometric analysis of AKT phosphorylation at S<sup>473</sup> in gastrocnemius muscle from chow and HFHS-fed WT and ATX<sup>+/-</sup> mice subjected to a 3-h food withdrawal, followed by the intraperitoneal injection of saline or 10 U/kg insulin ( $n = 3-5$ ). (A-C) Statistical analysis was performed using a two-way ANOVA followed by a Tukey's multiple comparison test; (B)  $^{###}p < 0.001$  as indicated; (C)  $^{****}p < 0.0001$  vs. saline.

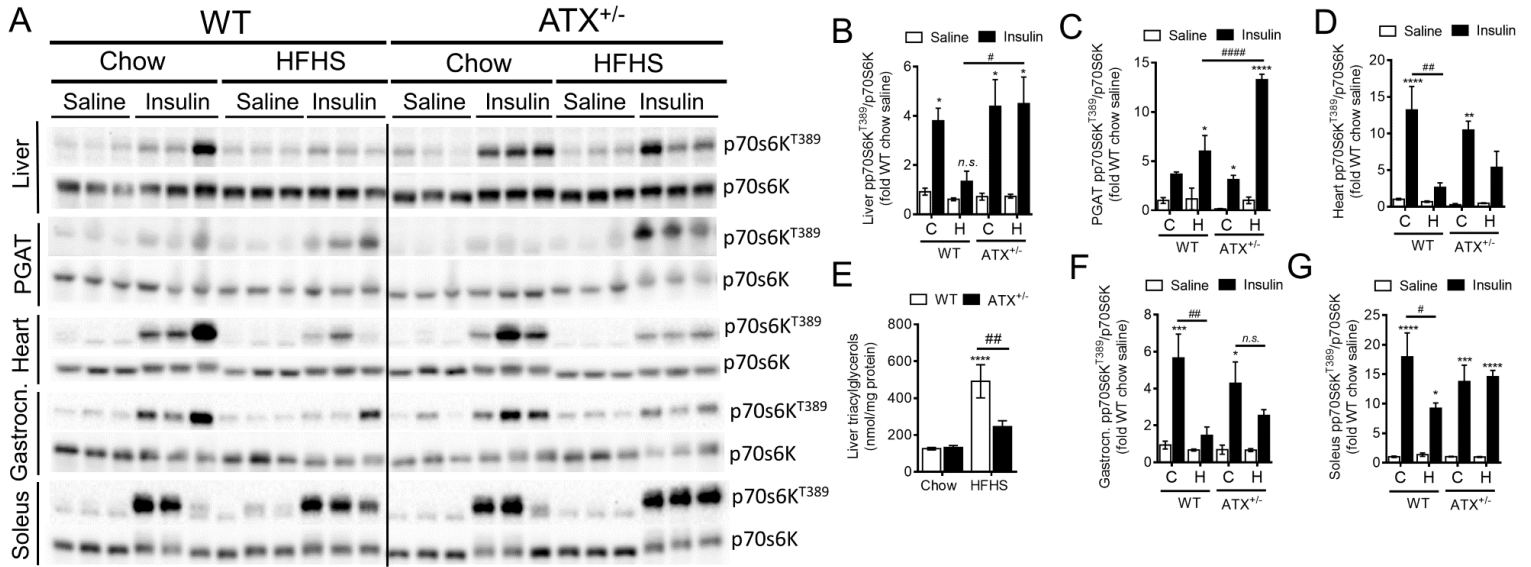

**Supplemental Figure S3. Male HFHS-fed ATX<sup>+/-</sup> mice show improved insulin signaling in liver, PGAT, heart, gastrocnemius and soleus muscle.** Immunoblot and densitometric analysis of p70S6K phosphorylation at T<sup>389</sup> in (A, B) liver, (A, C) PGAT, (A, D) heart, (A, F) gastrocnemius and, (A, G) soleus muscle from chow and HFHS-fed WT and ATX<sup>+/-</sup> mice subjected to a 3-h food withdrawal, followed by the intraperitoneal injection of saline or 10 U/kg insulin ( $n = 4-6$ ). (E) Liver TGs from chow and HFHS-fed WT and ATX<sup>+/-</sup> mice subjected to a 3-h food withdrawal ( $n = 9$ ). (B-G) Statistical analysis was performed using a two-way ANOVA followed by a Tukey's multiple comparison test; \* $p < 0.05$ , \*\* $p < 0.01$ , \*\*\* $p < 0.001$ , \*\*\*\* $p < 0.0001$  vs. saline; # $p < 0.05$ , ## $p < 0.01$ , #### $p < 0.0001$  as indicated; C, chow; H, HFHS.
